# Supplementary material for: Clinical Imaging Characteristics and Pathological Subtypes of 19 Cases of Paget's Disease of the Breast
Source: Research Square preprint supplement (doi:10.21203/rs.3.rs-7581085/v1), 2025-11-03
Supplement: Supplementary file 1 [file 868aa8e7dc64361d52e73259.docx]

**Table S1. Clinical and Imaging Characteristics of Mammary Paget's Disease by Pathological Subtypes**

| **Clinical and Imaging Characteristics** | **Pure Paget's** | **Paget's with DCIS1** | **Paget's with IDC2** |
| --- | --- | --- | --- |
| **Age** |  |  |  |
| ＜50 | 0 | 4 | 1 |
| ≥50 | 3 | 7 | 4 |
| **Initial Symptom** |  |  |  |
| Eczematous changes | 2 | 9 | 4 |
| Isolated mass | 0 | 2 | 0 |
| Mass and eczematous changes | 1 | 0 | 1 |
| **Mammographic Features** |  |  |  |
| **Calcification Morphology** |  |  |  |
| Amorphous | 0 | 2 | 0 |
| Coarse heterogeneous | 1 | 1 | 1* |
| Pleomorphic | 0 | 1 | 1* |
| Punctate | 0 | 6 | 4 |
| **Skin thickening** |  |  |  |
| Yes | 0 | 2 | 1 |
| No | 3 | 9 | 4 |
| **Calcification Distribution** |  |  |  |
| Clustered | 0 | 3 | 1 |
| Segmental | 1 | 2 | 2* |
| Regional | 0 | 5 | 3* |
| **Nodular opacity** |  |  |  |
| Yes | 0 | 7 | 3 |
| No | 3 | 4 | 2 |
| **Ultrasonographic Findings** |  |  |  |
| **Hypoechoic nodule** |  |  |  |
| Yes | 2 | 7 | 4 |
| No | 1 | 4 | 1 |
| **Echogenic foci** |  |  |  |
| Yes | 0 | 4 | 4 |
| No | 3 | 7 | 1 |
| **NAC3 echo pattern** |  |  |  |
| Normal | 2 | 10 | 3 |
| Abnormal | 1 | 1 | 2 |
| **Axillary lymph nodes** |  |  |  |
| Normal | 3 | 10 | 4 |
| Abnormal | 0 | 1 | 1 |
| DCIS1: ductal carcinoma in situ; IDC2: invasive ductal carcinoma; NAC3: Nipple-areolar complex; *One case exhibited extensive segmental distribution of coarse heterogeneous and fine pleomorphic calcifications | | | |
